# Supplementary material for: A stable ZnCo2O4cocatalyst for photocatalytic CO2reduction
Source: Royal Society of Chemistry journal article supplement (doi:10.1039/c4cc07225a), 2014-11-25
Supplement: c4cc07225a1.pdf [file c4cc07225a1.pdf]

Electronic Supplementary Material (ESI) for Chemical Communications.

This journal is © The Royal Society of Chemistry 2014

## Electronic Supplementary Information

### **A Stable $\text{ZnCo}_2\text{O}_4$ Cocatalyst for Photocatalytic $\text{CO}_2$ Reduction**

Sibo Wang<sup>a</sup>, Zhengxin Ding<sup>\*a</sup> and Xincheng Wang<sup>\*a</sup>

State Key Laboratory of Photocatalysis on Energy and Environment, College of Chemistry, Fuzhou University, Fuzhou 350002, People's Republic of China.

E-mail: zxding@fzu.edu.cn; xcwang@fzu.edu.cn.

## **Experimental section**

### **Materials synthesis**

All the chemical reagents were analytical grade, purchased from Aladdin Chemical Company, and used as received without any further purification.

In the typical synthesis of  $\text{ZnCo}_2\text{O}_4$  nanorods, 2 mmol zinc nitrate hexahydrate  $[\text{Zn}(\text{NO}_3)_2 \cdot 6\text{H}_2\text{O}]$ , 4 mmol cobalt nitrate hexahydrate  $[\text{Co}(\text{NO}_3)_2 \cdot 6\text{H}_2\text{O}]$ , 4 mmol ammonium fluoride ( $\text{NH}_4\text{F}$ ), and 10 mmol urea  $[\text{CO}(\text{NH}_2)_2]$  were added to 70 ml distilled water and the mixture was stirred intensely for 1 h to form a homogeneous solution. Then, the solution was transferred into a Teflon-lined stainless autoclave. The autoclave was sealed and heated at 120 °C. After for 5 h, the autoclave cooled down to room temperature naturally. The product was collected, washed by distilled water for several time to remove the unreacted ions, and dried at 60 °C in an oven for 12h. At last, the sample was thermal treated at 400 °C for 2 h with a ramping rate of 2 °C min<sup>-1</sup>.

### **Materials characterization**

X-ray diffraction (XRD) patterns were collected on a Bruker D8 Advance instrument (Cu K $\alpha$ 1 irradiation,  $\lambda = 1.5406 \text{ \AA}$ ). The accelerating voltage and the applied current were 40 KV and 40 mA, respectively. Data were recorded at a scanning rate of 0.02° 2 $\theta$  s<sup>-1</sup> in the 2 $\theta$  region of 15–80°. Hitachi New Generation SU8010 field emission scanning electron microscope (SEM) was employed to obtain the SEM images, energy dispersive X-ray (EDX) spectrum, and the corresponding EDX elemental mappings of the samples. Transmission electron microscopy (TEM) measurements were conducted using a JEOL model JEM 2010 EX instrument at an accelerating voltage of 200 kV with the sample supported on a copper

grid. X-ray photoelectron spectroscopy (XPS) characterization was carried out on a PHI Quantum 2000 XPS system with a monochromatic Al K $\alpha$  source and a charge neutralizer. The X-ray photoelectron spectra of all of the elements were referenced to the C 1s peak arising from adventitious carbon (its binding energy was set at 284.6 eV). Specific surface area were computed from the results of N<sub>2</sub> physisorption at 77 K (Micromeritics ASAP 2020) by using the Brunauer–Emmett–Teller (BET) and Barrett–Joyner–Halenda (BJH) methods. UV-vis diffuse reflectance spectra (DRS) spectra were obtained on a Varian Cary 500 UV-vis-NIR spectrophotometer. BaSO<sub>4</sub> was used as a reflectance standard. The absorbance spectrum of the Ru-dye solution was recorded by a Varian Cary 50 UV-vis spectrophotometer. Inductively coupled plasma mass spectrometry (ICP-MS, XSeries II Thermo Scientific) was used to analyse the supernatant of the reaction mixture.

Mott-Schottky measurement was performed on a Zenuium electrochemical workstation (Zahner Co.). The measurement was performed in a conventional three electrodes cell using Pt plate and Ag/AgCl electrode as the counter electrode and reference electrode, respectively. The working electrode was prepared on an FTO glass: 3 mg of the powder ZnCo<sub>2</sub>O<sub>4</sub> sample was mixed with 1.0 mL of ethanol with sonication for 30 min to get slurry. Then, 20  $\mu$ L of the slurry was spreading onto FTO glass whose side part was previously protected by Scotch tape, and then the electrode was air dried for 24h. For Mott-Schottky experiment, the potential ranged from - 0.4 to 0.1 V (vs. Ag/AgCl), and the frequency were 0.5, 1.0, and 1.5 kHz. Prior to all measurements, the electrolyte (0.2 M Na<sub>2</sub>SO<sub>4</sub> aqueous solution) was purged with nitrogen.

Gas chromatographic analysis was conducted using an Agilent 7820A gas

chromatography equipped with a thermal conductivity detector (TCD) and a TD-01 packed column, using Ar as the carrier gas. The oven temperature was held constant at 50 °C. Inlet and detector temperature were set at 120 °C and 200 °C, respectively. HP 5973 GC-MS was used to analyse the products of the  $^{13}\text{CO}_2$  isotopic experiment.

### **Photocatalytic performance**

The photocatalytic performance of  $\text{ZnCo}_2\text{O}_4$  was evaluated by  $\text{CO}_2$  reduction reactions under mild reaction conditions. Typically, the catalytic reactions were performed in an 80 ml reactor at 30 °C controlled by cooling water and 1 atm  $\text{CO}_2$  partial pressure. The reaction system contained  $[\text{Ru}(\text{bpy})_3]\text{Cl}_2 \cdot 6\text{H}_2\text{O}$  (bpy = 2,2'-bipyridine, 10  $\mu\text{mol}$ ),  $\text{ZnCo}_2\text{O}_4$  (4  $\mu\text{mol}$ ), solvent (5 ml, acetonitrile:  $\text{H}_2\text{O}$  = 3: 2), TEOA (1 ml), stirred with a magnetic stirrer, and irradiated by a Xe lamp with a 400 nm cutoff filter. After reactions, the produced gases were analyzed and quantified by gas chromatograph.

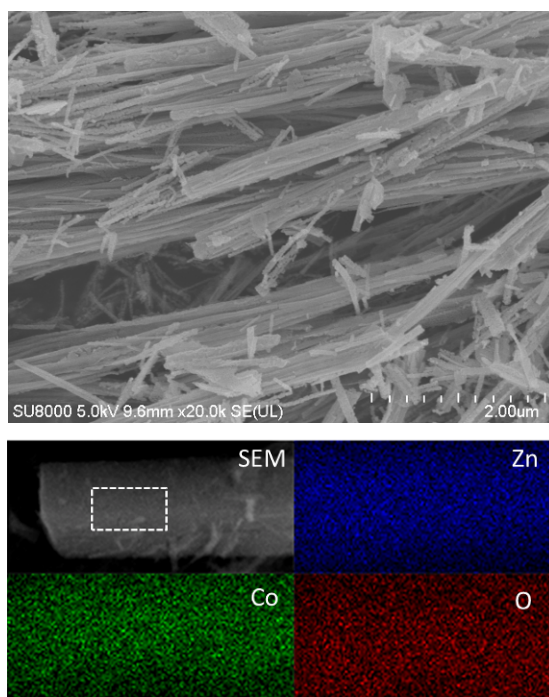

**Fig. S1** Low-magnification SEM image and EDX elemental mappings of Zn, Co, and O for the ZnCo<sub>2</sub>O<sub>4</sub> nanorods.

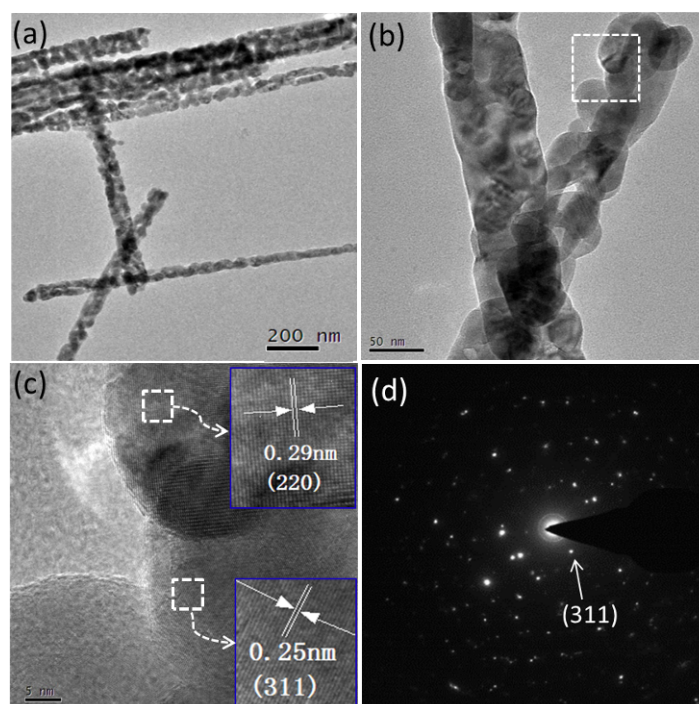

**Fig. S2** (a, b) Low-magnification and (c) high-resolution TEM (HRTEM) images of the synthesized  $\text{ZnCo}_2\text{O}_4$  nanorods. (d) The corresponding SAED pattern.

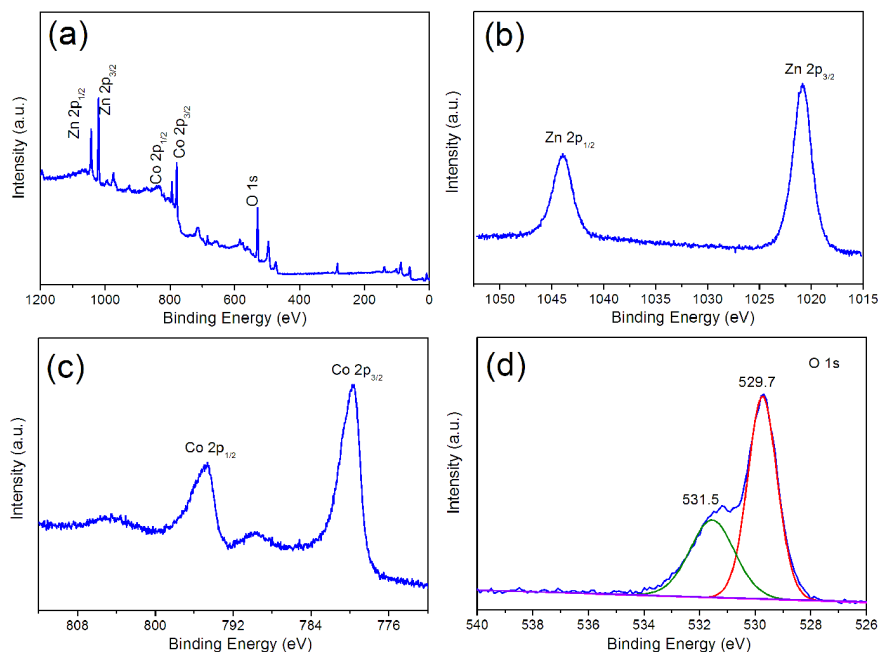

**Fig. S3** XPS spectra of the  $\text{ZnCo}_2\text{O}_4$  nanorods: (a) survey spectrum and high-resolution spectra of (b) Zn 2p, (c) Co 2p and (d) O 1s.

The survey spectrum (Fig. S3a) gives the signals of Zn, Co, and O elements, in agreement with the results of EDX analysis. In the high-resolution Zn 2p spectrum (Fig. S3b), two peaks with the binding energy values of 1044.0 and 1020.8 eV (assigned to Zn  $2p_{1/2}$  and Zn  $2p_{3/2}$ , respectively) are observed, indicating the Zn(II) oxidation state of  $\text{ZnCo}_2\text{O}_4$ .<sup>1</sup> In the spectrum of Co 2p (Fig. S3c), the two major signals at 794.6 and 779.7 eV can be correspondingly attributed to Co  $2p_{1/2}$  and Co  $2p_{3/2}$ , with a spin-orbit splitting of ca. 15.0 eV. Additionally, there are two shake-up satellite peaks at ~804.5 and ~789.6 eV. The energy gap between the Co 2p main peak and the satellite peak is about 9.9 eV. In general speaking, if the energy gap is 9-10 eV, the Co cation holds a valence of 3+.<sup>2,3</sup> The two signals at 531.5 and 529.7 eV in the O 1s spectrum (Fig. S3d) are ascribed to the lattice oxygen in the spinel  $\text{ZnCo}_2\text{O}_4$  and the oxygen of hydroxide ions.<sup>4</sup>

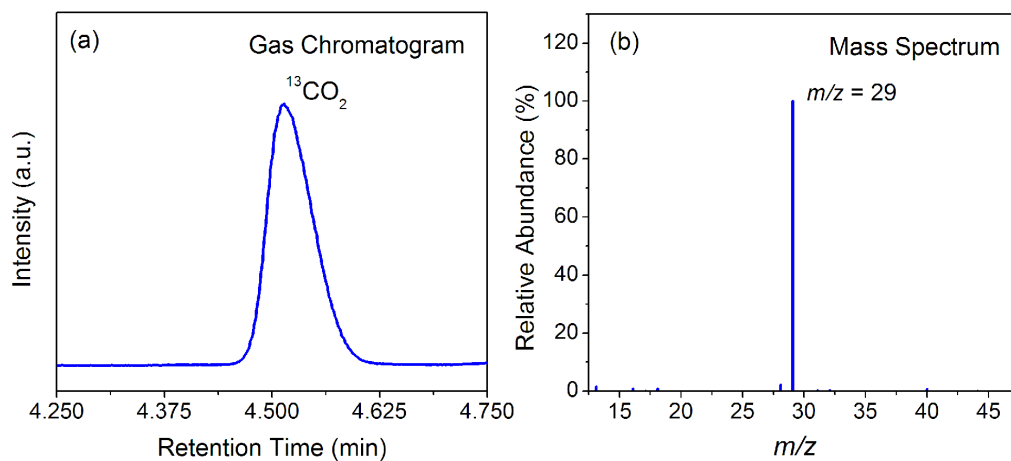

**Fig. S4** (a) Gas chromatogram and (b) mass spectrum of GC-MS analysis for the produced CO from the isotopic experiment using  $^{13}\text{CO}_2$ . The peak in the gas chromatogram at retention time of 4.51 min (Fig. S4a), and the signal with  $m/z$  value of 29 in the mass spectrum (Fig. S4b) are assigned to  $^{13}\text{CO}$ .



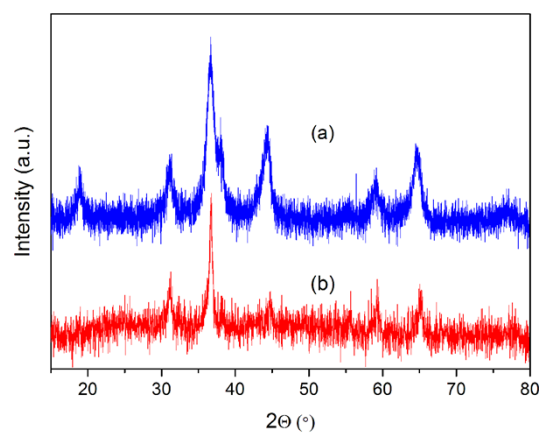

**Fig. S5** XRD patterns of the ZnCo<sub>2</sub>O<sub>4</sub> nanorods: (a) fresh sample and (s) used sample after the stability test for ten repeated operations.

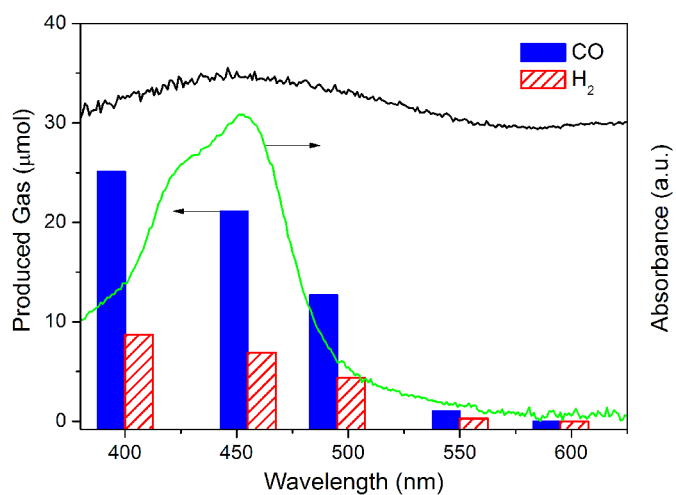

**Fig. S6** Wavelength-dependent CO/H<sub>2</sub> evolution from the ZnCo<sub>2</sub>O<sub>4</sub> catalysed CO<sub>2</sub> photoreduction system. The lines are the UV-Vis absorbance spectra of the Ru-dye (green) and ZnCo<sub>2</sub>O<sub>4</sub> (black). The wavelength of the incident light was controlled by applying some appropriate long-pass cut-off filters.

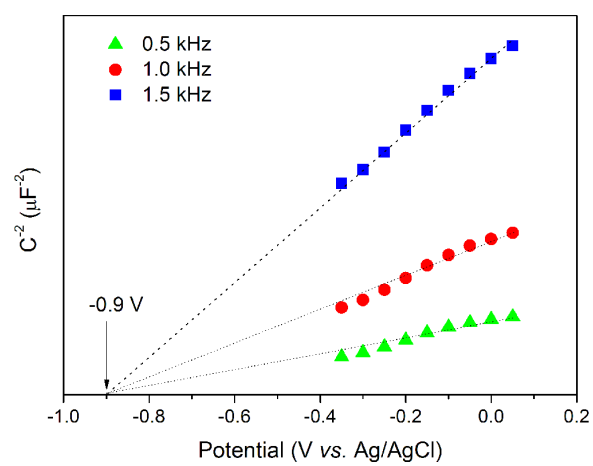

**Fig. S7** Mott-Schottky plots of the  $\text{ZnCo}_2\text{O}_4$  sample.

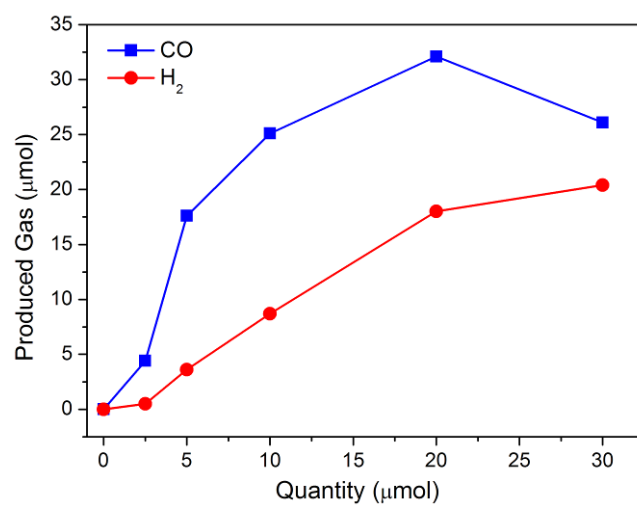

**Fig. S8** Productions of CO and H<sub>2</sub> produced from the photocatalytic system as a function of the Ru complex quantity added in the reaction system.

**Table S1** Studies on the catalytic activity of the reaction system under various conditions.<sup>a</sup>

| Entry          | CO (μmol)         | H <sub>2</sub> (μmol) | CO+H <sub>2</sub> (μmol) | Sel. <sub>CO</sub> <sup>b</sup> (%) |
|----------------|-------------------|-----------------------|--------------------------|-------------------------------------|
| 1              | 25.1              | 8.7                   | 33.8                     | 74.3                                |
| 2 <sup>c</sup> | n.d. <sup>d</sup> | n.d.                  | /                        | /                                   |
| 3 <sup>e</sup> | n.d.              | n.d.                  | /                        | /                                   |
| 4 <sup>f</sup> | n.d.              | n.d.                  | /                        | /                                   |
| 5 <sup>g</sup> | 1.2               | 0.6                   | 1.8                      | 66.7                                |
| 6 <sup>h</sup> | 15.9              | 5.6                   | 21.5                     | 73.9                                |
| 7 <sup>i</sup> | 20.2              | 7.2                   | 27.4                     | 73.7                                |
| 8 <sup>j</sup> | n.d.              | 1.0                   | 1.0                      | 0                                   |
| 9 <sup>k</sup> | 1.5               | 0.9                   | 2.4                      | 62.5                                |

<sup>a</sup> Reaction conditions: [Ru(bpy)<sub>3</sub>]Cl<sub>2</sub>·6H<sub>2</sub>O (10 μmol), ZnCo<sub>2</sub>O<sub>4</sub> (4 μmol), solvent (5 ml, acetonitrile: H<sub>2</sub>O = 3: 2), TEOA (1 ml), 30 °C, 1 atm CO<sub>2</sub>, λ ≥ 400 nm, 1 h. <sup>b</sup> Sel.<sub>CO</sub> = mol (CO)/mol (CO + H<sub>2</sub>). <sup>c</sup> In the dark. <sup>d</sup> Not detectable. <sup>e</sup> Without [Ru(bpy)<sub>3</sub>]Cl<sub>2</sub>·6H<sub>2</sub>O. <sup>f</sup> Without TEOA. <sup>g</sup> Without ZnCo<sub>2</sub>O<sub>4</sub>. <sup>h</sup> Using Co<sup>2+</sup> to replace ZnCo<sub>2</sub>O<sub>4</sub>. <sup>i</sup> Using Co<sub>3</sub>O<sub>4</sub> to replace ZnCo<sub>2</sub>O<sub>4</sub>. <sup>j</sup> Using Ar to replace CO<sub>2</sub>. <sup>k</sup> Using the supernatant after photocatalytic reaction.

## References

- 1 H. Long, T. Shi, S. Jiang, S. Xi, R. Chen, S. Liu, G. Liao, Z. Tang, *J. Mater. Chem. A*, 2014, **2**, 3741.
- 2 J. Bai, X. Li, G. Liu, Y. Qian, S. Xiong, *Adv. Funct. Mater.*, 2014, **24**, 3012.
- 3 W. Wei, W. Chen, D. G. Ivey, *Chem. Mater.*, 2008, **20**, 1941.
- 4 T. F. Huang, S. G. Mohamed, C. C. Shen, Y. Q. Tsai, W. S. Chang, R. S. Liu, *Nanoscale*, 2013, **5**, 12115.
